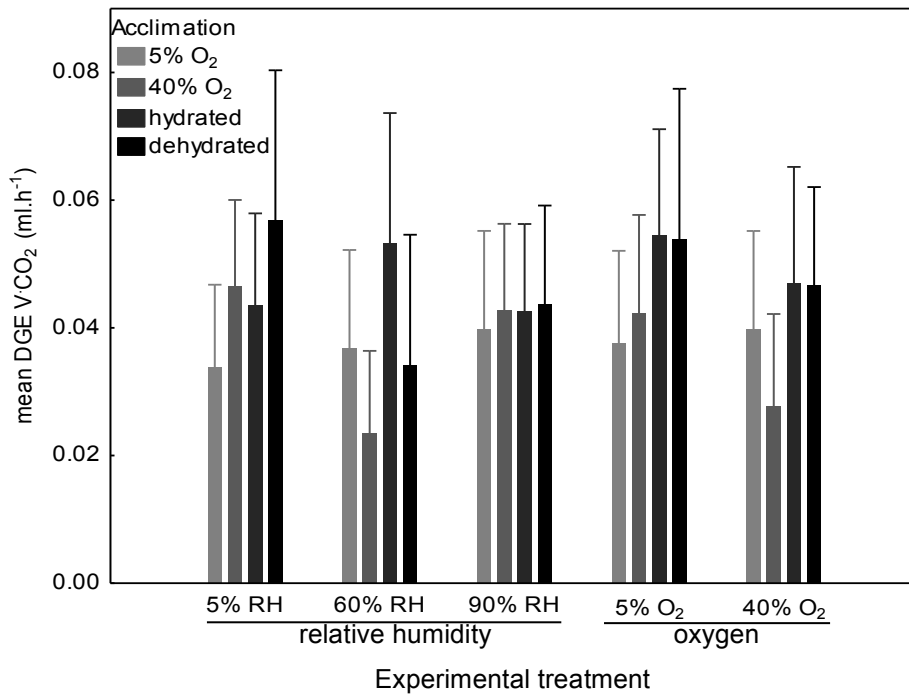

**Fig. S1. Summary results of the effects of experimental treatment and acclimation (means+95% confidence intervals) the mean rate of CO<sub>2</sub> release ( $\dot{V}\text{CO}_2$ ) during an entire DGE cycle.** Acclimation treatment had a significant effect on the mean  $\dot{V}\text{CO}_2$  during a DGE cycle (Wald  $\chi^2=7.972$ , d.f.=3,  $p=0.047$ ). There was a significant relationship between the mean  $\dot{V}\text{CO}_2$  during a DGE cycle and mass ( $p<0.001$ ), therefore mass was included as a covariate. There was no significant interaction between acclimation and experimental treatment.

Table S1. Means and standard errors for the recorded variables for each of the different acclimations (5% O<sub>2</sub>; 40% O<sub>2</sub>; hydrated; dehydrated) at each of the different treatments (5% RH; 90% RH; 5% O<sub>2</sub>; 40% O<sub>2</sub>; control). Mass was a significant covariate in all cases, except for mean O-phase duration and water loss rate. Where mass was a significant covariate the residual data were used to calculate the means. Sample sizes (n) and mean mass for each treatment group within an acclimation are also indicated.

| Acclimation        | Treatment          | n  | mean mass (g) | mean duration (min) ± SE |           |          | mean V̇CO <sub>2</sub> (ml.h <sup>-1</sup> ) ± SE |               |               | CO <sub>2</sub> release volume (ml) ± SE | WLR ± SE (mg.h <sup>-1</sup> ) |
|--------------------|--------------------|----|---------------|--------------------------|-----------|----------|---------------------------------------------------|---------------|---------------|------------------------------------------|--------------------------------|
|                    |                    |    |               | DGE cycle                | CF-phase  | O-phase  | DGE cycle                                         | CF-phase      | O-phase       | O-phase                                  |                                |
| 5% O <sub>2</sub>  | 5% RH              | 10 | 0.398         | 65.5±17.0                | 47.6±12.6 | 17.1±2.4 | 0.0346±0.0032                                     | 0.0114±0.0019 | 0.1031±0.0141 | 0.0291±0.0067                            | 1.549±0.506                    |
|                    | 90% RH             | 7  | 0.440         | 49.7±20.4                | 36.3±15.0 | 15.8±2.9 | 0.0382±0.0038                                     | 0.0010±0.0022 | 0.1051±0.0168 | 0.0250±0.0080                            | 0.240±0.604                    |
|                    | control            | 7  | 0.442         | 58.2±20.4                | 46.5±15.0 | 14.5±2.9 | 0.0351±0.0038                                     | 0.0106±0.0022 | 0.1252±0.0168 | 0.0238±0.0080                            | 0.320±0.604                    |
|                    | 5% O <sub>2</sub>  | 8  | 0.368         | 71.3±19.1                | 43.2±14.1 | 24.7±2.7 | 0.0400±0.0036                                     | 0.0138±0.0021 | 0.0867±0.0157 | 0.0339±0.0075                            | 0.662±0.565                    |
|                    | 40% O <sub>2</sub> | 7  | 0.436         | 38.2±20.4                | 30.7±15.0 | 9.5±2.9  | 0.0385±0.0038                                     | 0.0125±0.0022 | 0.1347±0.0168 | 0.0191±0.0080                            | 0.340±0.604                    |
| 40% O <sub>2</sub> | 5% RH              | 9  | 0.492         | 42.4±18.0                | 33.5±13.3 | 15.5±2.5 | 0.0421±0.0034                                     | 0.0103±0.0020 | 0.1452±0.0148 | 0.0274±0.0070                            | 2.083±0.533                    |
|                    | 90% RH             | 9  | 0.466         | 37.4±18.0                | 26.2±13.3 | 15.7±2.5 | 0.0398±0.0034                                     | 0.0098±0.0020 | 0.1132±0.0148 | 0.0191±0.0070                            | -0.162±0.533                   |
|                    | control            | 10 | 0.286         | 89.0±17.0                | 65.0±12.6 | 13.9±2.4 | 0.0303±0.0032                                     | 0.0090±0.0019 | 0.1056±0.0141 | 0.0365±0.0067                            | 0.184±0.506                    |
|                    | 5% O <sub>2</sub>  | 7  | 0.436         | 55.9±20.4                | 33.2±15.0 | 24.9±2.9 | 0.0409±0.0038                                     | 0.0164±0.0022 | 0.0869±0.0168 | 0.0307±0.0080                            | 0.671±0.604                    |
|                    | 40% O <sub>2</sub> | 8  | 0.390         | 58.3±19.1                | 46.1±14.1 | 10.6±2.7 | 0.0289±0.0036                                     | 0.0097±0.0021 | 0.1106±0.0157 | 0.0218±0.0075                            | 0.451±0.604                    |
| hydrated           | 5% RH              | 8  | 0.487         | 51.6±19.1                | 34.7±14.1 | 17.1±2.7 | 0.0428±0.0036                                     | 0.0138±0.0021 | 0.1030±0.0157 | 0.0299±0.0075                            | 1.634±0.565                    |
|                    | 90% RH             | 9  | 0.439         | 48.1±18.0                | 32.0±13.3 | 16.7±2.5 | 0.0465±0.0034                                     | 0.0122±0.0020 | 0.1197±0.0148 | 0.0309±0.0070                            | 2.714±0.533                    |
|                    | control            | 4  | 0.672         | 64.2±27.0                | 45.4±19.9 | 17.8±3.8 | 0.0352±0.0050                                     | 0.0114±0.0030 | 0.1086±0.0223 | 0.0348±0.0106                            | 0.606±0.799                    |
|                    | 5% O <sub>2</sub>  | 6  | 0.530         | 50.0±22.0                | 24.2±16.2 | 25.7±3.1 | 0.0497±0.0041                                     | 0.0191±0.0024 | 0.0716±0.0182 | 0.0322±0.0086                            | 0.881±0.653                    |
|                    | 40% O <sub>2</sub> | 5  | 0.448         | 58.1±24.1                | 40.6±17.8 | 18.0±3.4 | 0.0499±0.0045                                     | 0.0128±0.0027 | 0.1265±0.0199 | 0.0400±0.0094                            | 1.089±0.715                    |
| dehydrated         | 5% RH              | 3  | 0.621         | 56.8±31.1                | 38.3±23.0 | 17.8±4.4 | 0.0435±0.0058                                     | 0.0129±0.0034 | 0.1119±0.0257 | 0.0335±0.0122                            | 1.360±0.923                    |
|                    | 90% RH             | 7  | 0.416         | 53.1±20.4                | 33.2±15.0 | 20.6±2.9 | 0.0497±0.0038                                     | 0.0137±0.0022 | 0.1253±0.0168 | 0.0366±0.0080                            | 0.253±0.604                    |
|                    | control            | 4  | 0.416         | 59.8±27.0                | 36.5±19.9 | 24.0±3.8 | 0.0402±0.0050                                     | 0.0098±0.0030 | 0.1031±0.0223 | 0.0226±0.0106                            | 1.495±0.799                    |
|                    | 5% O <sub>2</sub>  | 3  | 0.465         | 63.9±31.1                | 20.2±23.0 | 44.1±4.4 | 0.0553±0.0058                                     | 0.0145±0.0034 | 0.0785±0.0257 | 0.0586±0.0122                            | 0.591±0.923                    |
|                    | 40% O <sub>2</sub> | 7  | 0.441         | 46.7±20.4                | 31.4±15.0 | 15.8±2.9 | 0.0503±0.0038                                     | 0.0162±0.0022 | 0.1550±0.0168 | 0.0327±0.0080                            | 1.316±0.604                    |

DGE, discontinuous gas exchange; CF, closed-flutter phase; O, open phase;  $\dot{V}\text{CO}_2$ , rate of  $\text{CO}_2$  release; RH, relative humidity; WLR, water loss rate.

\*Mass was a significant covariate in all cases, except for mean O-phase duration and water loss rate.

Where mass was a significant covariate the residual data were used to calculate mean values.

---
